# Supplementary material for: Towards efficient calcium extraction from steel slag and carbon dioxide utilisation via pressure-swing mineral carbonation
Source: Royal Society of Chemistry journal article supplement (doi:10.1039/c8re00167g), 2018-11-14
Supplement: c8re00167g1.pdf [file c8re00167g1.pdf]

## Supporting information

Here we give some additional results which may be useful in interpreting the data presented in the main paper. Fig S1 is to be read with Fig 4 in the main paper; while concentration profiles are shown in Fig 4 presents the percentages of Ca and Mg extracted. Fig S2 shows the results from TGA referred to in section 4.4.

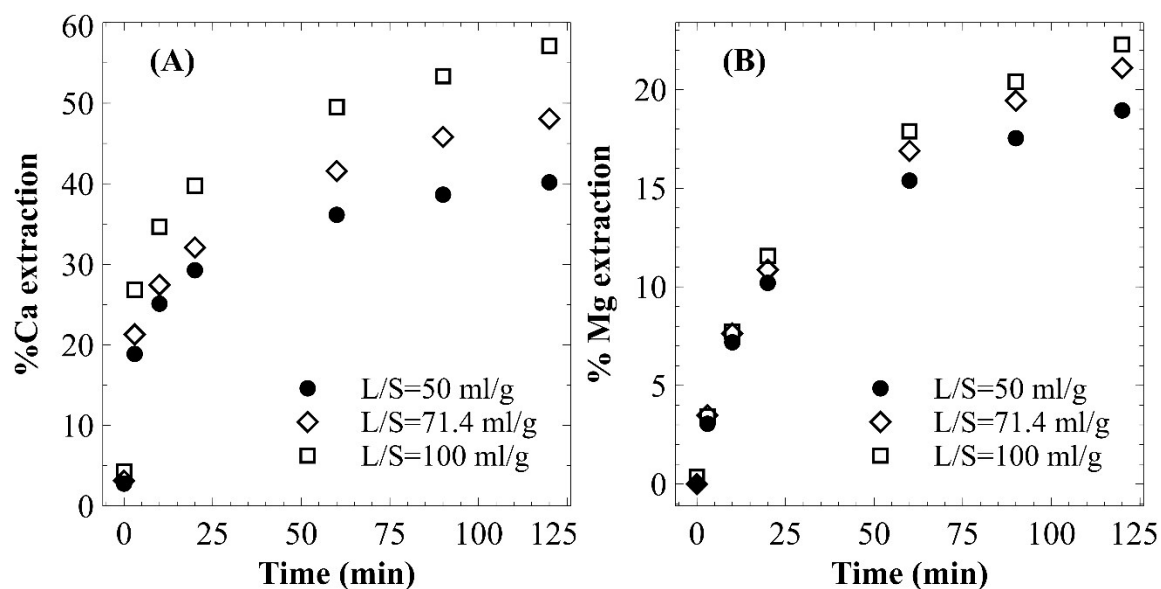

Fig. S1 Influence of L/S on (A) calcium extraction efficiency, and (B) magnesium extraction efficiency from the BOF slag

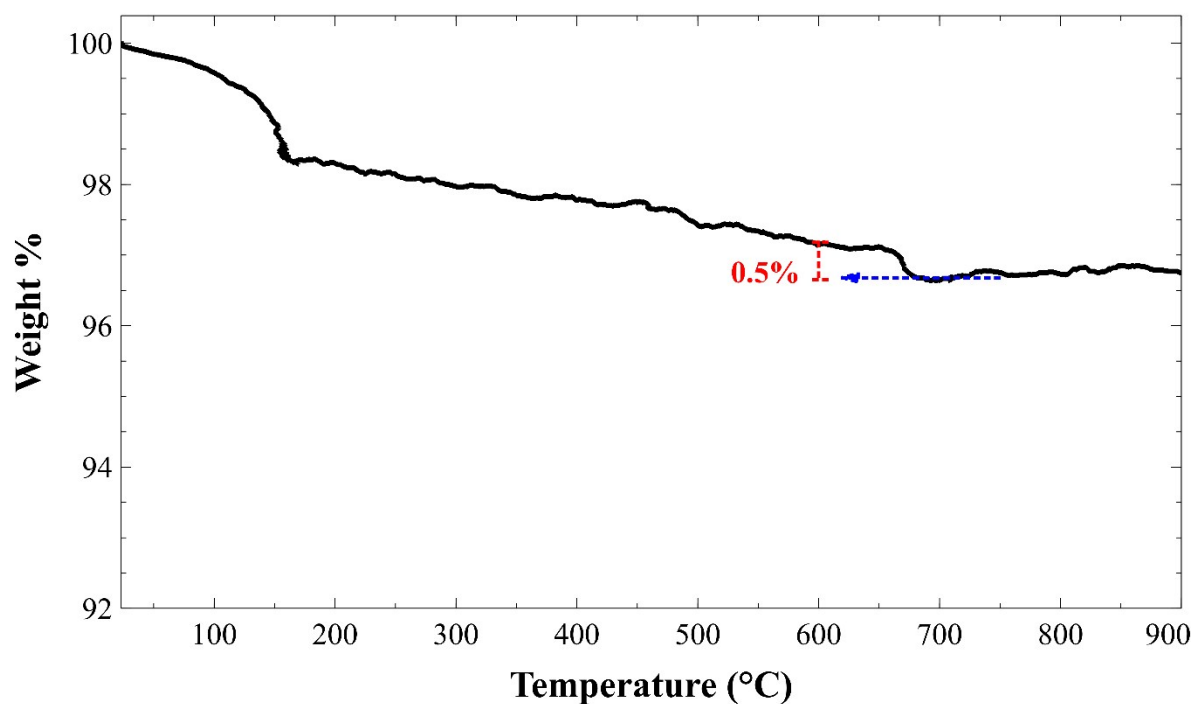

Fig. S2 Thermogravimetric analysis (TGA) curve for slag residue (90–125  $\mu\text{m}$ ) obtained after 240 min of dissolution (L/S = 10ml/g, initial  $\text{CO}_2$  Pressure = 12.4 bar)

The 0.5% weight loss observed in the Fig. S2 is insignificant. If the supersaturated solution discharged as precipitation during dissolution step, corresponding weight loss would be upside of 15%.
